# Supplementary material for: A New Green Model for the Bioremediation and Resource Utilization of Livestock Wastewater
Source: MDPI journal article supplement (doi:10.3390/ijerph18168634), 2021-08-16
Supplement: s1 [file s1]

**Table S1 Sixty-eight different pesticides content in water dropwort used for LW management**

| No. | Item                                                    | Unit                | Standard | Content      | Detection threshold | Single conclusion | Test method                       |
|-----|---------------------------------------------------------|---------------------|----------|--------------|---------------------|-------------------|-----------------------------------|
| 1   | Methamidophos                                           | mg·kg <sup>-1</sup> | ≤ 0.05   | not detected | 0.01                | Meet standard     | NY/T 761-2008<br>Method 2, Part 1 |
| 2   | Parathion                                               | mg·kg <sup>-1</sup> | ≤ 0.01   | not detected | 0.008               | Meet standard     | GB/T 5009.145-2003                |
| 3   | Methyl parathion                                        | mg·kg <sup>-1</sup> | ≤ 0.02   | not detected | 0.02                | Meet standard     | NY/T 761-2008<br>Method 2, Part 1 |
| 4   | Hexachlorocyclohexane                                   | mg·kg <sup>-1</sup> | ≤ 0.05   | not detected | 0.0004              | Meet standard     | NY/T 761-2008<br>Method 2, Part 2 |
| 5   | Phorate                                                 | mg·kg <sup>-1</sup> | ≤ 0.01   | not detected | 0.01                | Meet standard     | GB 23200.8-2016                   |
| 6   | Omethoate                                               | mg·kg <sup>-1</sup> | ≤ 0.02   | not detected | 0.02                | Meet standard     | NY/T 761-2008<br>Method 2, Part 1 |
| 7   | Isocarbophos                                            | mg·kg <sup>-1</sup> | ≤ 0.05   | not detected | 0.03                | Meet standard     | NY/T 761-2008<br>Method 2, Part 1 |
| 8   | Sofenphos-methyl                                        | mg·kg <sup>-1</sup> | ≤ 0.01   | not detected | 0.004               | Meet standard     | GB/T 2009.144-2003                |
| 9   | Carbofuran                                              | mg·kg <sup>-1</sup> | ≤ 0.02   | not detected | 0.01                | Meet standard     | NY/T 761-2008 Part 3              |
| 10  | Aldicarb                                                | mg·kg <sup>-1</sup> | ≤ 0.03   | not detected | 0.009               | Meet standard     | NY/T 761-2008 Part 3              |
| 11  | Chlorpyrifos                                            | mg·kg <sup>-1</sup> | /        | not detected | 0.02                | /                 | NY/T 761-2008<br>Method 2, Part 1 |
| 12  | Triazophos                                              | mg·kg <sup>-1</sup> | /        | not detected | 0.01                | /                 | NY/T 761-2008<br>Method 2, Part 1 |
| 13  | Dimethoate                                              | mg·kg <sup>-1</sup> | /        | not detected | 0.02                | /                 | NY/T 761-2008<br>Method 2, Part 1 |
| 14  | Acephate                                                | mg·kg <sup>-1</sup> | ≤ 1      | not detected | 0.03                | Meet standard     | NY/T 761-2008<br>Method 2, Part 1 |
| 15  | Lannate                                                 | mg·kg <sup>-1</sup> | ≤ 0.2    | not detected | 0.01                | Meet standard     | NY/T 761-2008 Part 3              |
| 16  | Fenvalerate and S-fenvalerate (Measured as Fenvalerate) | mg·kg <sup>-1</sup> | /        | not detected | 0.002               | /                 | NY/T 761-2008<br>Method 2, Part 2 |
| 17  | DDVP                                                    | mg·kg <sup>-1</sup> | ≤ 0.2    | not detected | 0.01                | Meet standard     | NY/T 761-2008<br>Method 2, Part 1 |
| 18  | Profenofos                                              | mg·kg <sup>-1</sup> | /        | not detected | 0.04                | /                 | NY/T 761-2008<br>Method 2, Part 1 |
| 19  | Fenitrothion                                            | mg·kg <sup>-1</sup> | ≤ 0.5    | not detected | 0.02                | Meet standard     | NY/T 761-2008<br>Method 2, Part 1 |
| 20  | Diazinon                                                | mg·kg <sup>-1</sup> | /        | not detected | 0.02                | /                 | NY/T 761-2008<br>Method 2, Part 1 |
| 21  | Malathion                                               | mg·kg <sup>-1</sup> | /        | not detected | 0.03                | /                 | NY/T 761-2008<br>Method 2, Part 1 |
| 22  | Phosemet                                                | mg·kg <sup>-1</sup> | /        | not detected | 0.06                | /                 | NY/T 761-2008<br>Method 2, Part 1 |
| 23  | Phosalone                                               | mg·kg <sup>-1</sup> | /        | not detected | 0.05                | /                 | NY/T 761-2008<br>Method 2, Part 1 |
| 24  | Phoxim                                                  | mg·kg <sup>-1</sup> | ≤ 0.05   | not detected | 0.01                | Meet standard     | GB/T 5009.102-2003                |
| 25  | Cypermethrin and Efficient cypermethrin                 | mg·kg <sup>-1</sup> | /        | not detected | 0.003               | /                 | NY/T 761-2008<br>Method 2, Part 2 |

|    |                                                                 |                     |        |              |         |               |                                   |
|----|-----------------------------------------------------------------|---------------------|--------|--------------|---------|---------------|-----------------------------------|
|    | (measured as cypermethrin)                                      |                     |        |              |         |               |                                   |
| 26 | Fenpropathrin                                                   | mg·kg <sup>-1</sup> | /      | not detected | 0.002   | /             | NY/T 761-2008<br>Method 2, Part 2 |
| 27 | Cyhalothrin and Efficient cyhalothrin (measured as cyhalothrin) | mg·kg <sup>-1</sup> | /      | not detected | 0.0005  | /             | NY/T 761-2008<br>Method 2, Part 2 |
| 28 | Cyfluthrin and Efficient cyfluthrin (measured as cyfluthrin)    | mg·kg <sup>-1</sup> | /      | not detected | 0.002   | /             | NY/T 761-2008<br>Method 2, Part 2 |
| 29 | Deltamethrin                                                    | mg·kg <sup>-1</sup> | /      | not detected | 0.001   | /             | NY/T 761-2008<br>Method 2, Part 2 |
| 30 | Bifenthrin                                                      | mg·kg <sup>-1</sup> | /      | not detected | 0.0006  | /             | NY/T 761-2008<br>Method 2, Part 2 |
| 31 | Fluvalinate                                                     | mg·kg <sup>-1</sup> | /      | not detected | 0.002   | /             | NY/T 761-2008<br>Method 2, Part 2 |
| 32 | Flucythrinate                                                   | mg·kg <sup>-1</sup> | /      | not detected | 0.001   | /             | NY/T 761-2008<br>Method 2, Part 2 |
| 33 | Triadimefon                                                     | mg·kg <sup>-1</sup> | /      | not detected | 0.025   | /             | GB/T 23200.8-2016                 |
| 34 | Chlorothalonil                                                  | mg·kg <sup>-1</sup> | /      | not detected | 0.0003  | /             | NY/T 761-2008<br>Method 2, Part 2 |
| 35 | Iprodione                                                       | mg·kg <sup>-1</sup> | /      | not detected | 0.001   | /             | NY/T 761-2008<br>Method 2, Part 2 |
| 36 | Carbaryl                                                        | mg·kg <sup>-1</sup> | ≤ 1    | not detected | 0.01    | Meet standard | NY/T 761-2008 Part 3              |
| 37 | Dicofol                                                         | mg·kg <sup>-1</sup> | /      | not detected | 0.0008  | /             | NY/T 761-2008<br>Method 2, Part 2 |
| 38 | Procymidone                                                     | mg·kg <sup>-1</sup> | /      | not detected | 0.002   | /             | NY/T 761-2008<br>Method 2, Part 2 |
| 39 | Pentachloronitrobenzene                                         | mg·kg <sup>-1</sup> | /      | not detected | 0.00027 | /             | GB/T 5009.19-2008<br>Method 1     |
| 40 | Vinclozolin                                                     | mg·kg <sup>-1</sup> | /      | not detected | 0.0001  | /             | NY/T 761-2008<br>Method 2, Part 2 |
| 41 | Carbendazim                                                     | mg·kg <sup>-1</sup> | /      | not detected | 0.00012 | /             | GB/T 20769-2008                   |
| 42 | Imidacloprid                                                    | mg·kg <sup>-1</sup> | /      | not detected | 0.0055  | /             | GB/T 20769-2008                   |
| 43 | Fipronil                                                        | mg·kg <sup>-1</sup> | ≤ 0.02 | not detected | 0.002   | Meet standard | SN/T 1982-2007                    |
| 44 | Acetamiprid                                                     | mg·kg <sup>-1</sup> | /      | not detected | 0.01    | /             | GB/T 23584-2009                   |
| 45 | Pyridaben                                                       | mg·kg <sup>-1</sup> | /      | not detected | 0.00304 | /             | GB/T 20769-2008                   |
| 46 | Difenoconazole                                                  | mg·kg <sup>-1</sup> | /      | not detected | 0.075   | /             | GB 23200.8-2016                   |
| 47 | Pyrimethanil                                                    | mg·kg <sup>-1</sup> | /      | not detected | 0.00017 | /             | GB/T 20769-2008                   |
| 48 | Emamectin Benzoate                                              | mg·kg <sup>-1</sup> | /      | not detected | 0.00008 | /             | GB/T 20769-2008                   |
| 49 | Dimethomorph                                                    | mg·kg <sup>-1</sup> | /      | not detected | 0.00018 | /             | GB/T 20769-2008                   |
| 50 | Chlorfenapyr                                                    | mg·kg <sup>-1</sup> | /      | not detected | 0.025   | /             | GB 23200.8-2016                   |
| 51 | Prochloraz and Prochloraz-manganese chloride complex            | mg·kg <sup>-1</sup> | /      | not detected | 0.005   | /             | NY/T 1456-2007                    |
| 52 | Azoxystrobin                                                    | mg·kg <sup>-1</sup> | /      | not detected | 0.01    | /             | NY/T 1456-2007                    |
| 53 | Pendimethalin                                                   | mg·kg <sup>-1</sup> | /      | not detected | 0.05    | /             | GB 23200.8-2016                   |

|    |                                                                     |                     |     |              |         |               |                                   |
|----|---------------------------------------------------------------------|---------------------|-----|--------------|---------|---------------|-----------------------------------|
| 54 | Thiamethoxam                                                        | mg·kg <sup>-1</sup> | /   | not detected | 0.05    | /             | GB 23200.8-2016                   |
| 55 | Chlorfluazuron                                                      | mg·kg <sup>-1</sup> | /   | not detected | 0.0376  | /             | GB 23200.8-2016                   |
| 56 | Chlorobenzuron                                                      | mg·kg <sup>-1</sup> | /   | not detected | 0.03    | /             | GB/T 5009.135-2003                |
| 57 | Cyromazine                                                          | mg·kg <sup>-1</sup> | /   | not detected | 0.02    | /             | NY/T 1725-2009                    |
| 58 | Metalaxyl and metalaxyl-M (Measured as metalaxyl)                   | mg·kg <sup>-1</sup> | /   | not detected | 0.0376  | /             | GB 23200.8-2016                   |
| 59 | Propamocarb and propamocarb hydrochloride (Measured as propamocarb) | mg·kg <sup>-1</sup> | /   | not detected | 0.00002 | /             | GB/T 20769-2008                   |
| 60 | Paclobutrazol                                                       | mg·kg <sup>-1</sup> | /   | not detected | 0.00014 | /             | GB/T 20769-2008                   |
| 61 | Forchlorfenuron                                                     | mg·kg <sup>-1</sup> | /   | not detected | 0.0057  | /             | GB/T 20770-2008                   |
| 62 | Chlorantraniliprole                                                 | mg·kg <sup>-1</sup> | /   | not detected | /       | /             | GB/T 20769-2008                   |
| 63 | Permethrin                                                          | mg·kg <sup>-1</sup> | ≤ 1 | not detected | 0.001   | Meet standard | NY/T 761-2008<br>Method 2, Part 2 |
| 64 | Etofenprox                                                          | mg·kg <sup>-1</sup> | /   | not detected | 0.01    | /             | SN/T 2151-2008                    |
| 65 | Tebufenozide                                                        | mg·kg <sup>-1</sup> | /   | not detected | 0.00695 | /             | GB/T 20769-2008                   |
| 66 | Pyraclostrobin                                                      | mg·kg <sup>-1</sup> | /   | not detected | 0.00013 | /             | GB/T 20769-2008                   |
| 67 | Avermectin                                                          | mg·kg <sup>-1</sup> | /   | not detected | 0.01    | /             | GB 23200.19-2016                  |
| 68 | Diflubenzuron                                                       | mg·kg <sup>-1</sup> | /   | not detected | 0.04    | /             | GB/T 5009.147-2003                |
